# Supplementary material for: An organic–inorganic heterojunction electrocatalyst for highly efficient urea oxidation
Source: Royal Society of Chemistry journal article supplement (doi:10.1039/d4ta03048f), 2024-01-01
Supplement: d4ta03048f1.pdf [file d4ta03048f1.pdf]

## SUPPORTING INFORMATION

# An Organic-Inorganic Heterojunction Electrocatalyst for Highly Efficient Urea Oxidation

*Tzu-Ho Wu,<sup>[a]\*</sup> Zi-Ting Qiu,<sup>[a]</sup> Chih-Ning Hsieh,<sup>[a]</sup> Zi-Ting Chen,<sup>[b]</sup> Tzu-Wei Wang,<sup>[c]</sup>*

*Po-Liang Liu,<sup>[c,d]</sup> and Rong-Ho Lee<sup>[b,e]\*</sup>*

<sup>a</sup> Department of Chemical and Materials Engineering, National Yunlin University of Science and Technology, Yunlin 64002, Taiwan. E-mail: [wutzu@yuntech.edu.tw](mailto:wutzu@yuntech.edu.tw)

<sup>b</sup> Department of Chemical Engineering, National Chung Hsing University, Taichung 40227, Taiwan. E-mail: [rhl@dragon.nchu.edu.tw](mailto:rhl@dragon.nchu.edu.tw)

<sup>c</sup> Graduate Institute of Precision Engineering, National Chung Hsing University, Taichung 40227, Taiwan

<sup>d</sup> Department of Applied Materials and Optoelectronic Engineering, National Chi Nan University, Nantou 54561, Taiwan

<sup>e</sup> Department of Chemical Engineering and Materials Science, Yuan Ze University, Taoyuan 320315, Taiwan

## 1. Experimental Procedures

### Chemicals.

4-Aminobenzonitrile, p-bromobenzonitrile, trifluoromethanesulfonic acid, n-BuLi (2.5 M in hexane), N-formylpiperidine, 1,4-dioxane, mesitylene, acetic acid (HOAc), nickel(II) nitrate, urea, ethanol, and other chemicals were purchased from Sigma-Aldrich, Acros, Alfa, and TCI Chemical and used as received. 2,4,6-tris(4-aminophenyl)triazine (TPT-3NH<sub>2</sub>) and 2,4,6-tris(4-formylphenyl)-1,3,5-triazine (TPT-3CHO) were prepared according to the reported procedures.<sup>1</sup> Multi-walled carbon nanotubes (CNT) were purchased from Uni-onward, Taiwan, and the powders were functionalized by acid treatment prior to use.<sup>2</sup>

### Synthesis of COF and COF/CNT.

According to our previous work, the triazine-based covalent organic framework sample was prepared through Schiff base condensations.<sup>3</sup> Briefly, TPT-3NH<sub>2</sub> (53.1 mg) and TPT-3CHO (59.0 mg) were mixed in 1,4-dioxane/mesitylene/6 M HOAc (v/v/v = 1/1/0.24) in a Pyrex tube. It was degassed by applying three freeze/pump/thaw cycles and then heated at 120 °C for 3 days. The resulting precipitate was collected by suction filtration and washed several times with tetrahydrofuran (THF), acetone, and methanol. The TPTP-COF sample (denoted as COF) was obtained after drying at 120 °C under vacuum for 24 h. The COF/CNT sample was prepared followed by the same procedures but with the addition of CNT (30 wt.%) in the precursor solution. For comparison, 15 wt.% CNT was also used to prepare the COF/15%-CNT sample.

### Synthesis of Ni(OH)<sub>2</sub>, Ni(OH)<sub>2</sub>/COF, Ni(OH)<sub>2</sub>/CNT, and Ni(OH)<sub>2</sub>/COF/CNT

Ni(OH)<sub>2</sub> was prepared by chemical precipitation method. Nickel(II) nitrate (0.45 g) and urea (3 g) were mixed in deionized water in a conical flask, and the solution was maintained at 80 °C for 2 h. Afterward, the resulting precipitate was washed with deionized water and ethanol. The Ni(OH)<sub>2</sub> powder sample was collected after drying at 60 °C overnight. It followed the same procedures to prepare Ni(OH)<sub>2</sub>/COF, Ni(OH)<sub>2</sub>/CNT, Ni(OH)<sub>2</sub>/COF/CNT, and Ni(OH)<sub>2</sub>/COF/15%-CNT nanocomposites but with the addition of the as-prepared COF, CNT, COF/CNT, and COF/15%-CNT (50 mg) into the nickel nitrate/urea mixture, respectively.

### Materials characterization.

X-ray diffraction (XRD, Rigaku MiniFlex600), Raman microscopy (Renishaw, InVia confocal microscope with 633 nm laser source), X-ray photoelectron spectroscopy (XPS, ULVAC-PHI 5000 VersaProbe III with ultraviolet photoelectron spectroscopy,

UPS), scanning electron microscope (SEM, JEOL JSM-7610F Plus equipped with energy-dispersive X-ray spectroscopy (EDS)), transmission electron microscope (TEM, JEOL JEM-2010), thermogravimetric analysis (TGA, PerkinElmer TGA-4000 tested under airflow of 20 ml min<sup>-1</sup> at a ramping rate of 10 °C min<sup>-1</sup>), ultraviolet–visible (UV-vis) spectroscopy (Perkin Elmer Lambda 850), and Hall-effect Analyzer (Agilent, HP 4145B with the current resolution ≤100 fA) were used to analyze the synthesized samples.

### **Electrochemical measurements.**

The electrochemical tests were carried out by a three-electrode configuration on CH Instruments 6273D. was prepared by dropping the slurry onto Ni foam (NF) substrate with the slurry made of the prepared sample (Ni(OH)<sub>2</sub>, COF/CNT, Ni(OH)<sub>2</sub>/COF, Ni(OH)<sub>2</sub>/CNT, Ni(OH)<sub>2</sub>/COF/CNT, or Ni(OH)<sub>2</sub>/COF/15%-CNT), Super P carbon, and poly(vinylidene difluoride) binder in a weight ratio of 8:1:1. The mass loading of the electrode is controlled to ~1.25 mg cm<sup>-2</sup> (~1.0 mg cm<sup>-2</sup> for the active component). Hg/HgO and Pt wire were as reference and counter electrodes, respectively. 1 M KOH with 0.33 M urea was used as the electrolyte for the urea oxidation reaction (UOR), while 1 M KOH served as the electrolyte for the oxygen evolution reaction (OER). All the reported potential values were converted with respect to a reversible hydrogen electrode (RHE) according to the equation ( $E_{\text{RHE}} = E_{\text{Hg/HgO}} + 0.098 + 0.059 \text{ pH}$ ). Linear sweep voltammetry (LSV) was conducted at 5 mV s<sup>-1</sup>, and 80% *iR* compensation was applied to the LSV measurements and the corresponding Tafel analysis. Cyclic voltammetry (CV) was performed between 0.82 and 1.02 V from 10 to 100 mV s<sup>-1</sup> to evaluate double-layer capacitance (*C*<sub>DL</sub>). Chronoamperometry (CA) was undertaken at 1.40 V for 500 s for evaluating the reaction rate constant, while the Coulombic efficiencies were estimated from the current responses in UOR and OER by holding at the potentials between 1.27 and 1.47 V (interval of 20 mV, lasting 500 s for each step). Chronopotentiometry (CP) was evaluated at 20 mA cm<sup>-2</sup> for 24 h and 50 mA cm<sup>-2</sup> for 8 h.

### ***In situ* electrochemical Raman measurements.**

*In situ* Raman study was carried out in a commercial Raman cell (purchased from Shanghai Chuxi Industry Co., Ltd) using Hg/HgO as the reference electrode and a Pt wire as the counter electrode. 1 M KOH with 0.33 M urea was used as the electrolyte. Again, the Raman spectra were collected with a Raman microscope (Renishaw, InVia) using a 633 nm laser source. For potential dependent *in situ* experiments, the Raman spectra were collected at different potentials starting from open-circuit potential (OCP) to 1.48 V (vs. RHE). For each spectrum, the Ni(OH)<sub>2</sub>/COF/CNT electrode was pre-

polarized for 100 s and held during the spectral acquisition (~250 s) with the ranges of 400-600 and 950-1050  $\text{cm}^{-1}$ . For time dependent *in situ* experiments, the  $\text{Ni(OH)}_2/\text{COF}/\text{CNT}$  electrode was pre-polarized at 1.52 V (vs. RHE) for 1000 s. Then, the Raman spectra were recorded at rest conditions (i.e., without applied potential). To obtain better time resolved spectra, the detection range was adjusted to 400-600  $\text{cm}^{-1}$  corresponding to the acquisition time of ~60 s for each spectrum.

### Theoretical calculations.

This study employed first-principles calculations based on density functional theory (DFT) to optimize geometry on  $\text{Ni(OH)}_2$  and COF structures. The theoretical techniques used included the generalized gradient approximation (GGA) and the Perdew-Wang (PW91) correction.<sup>4-7</sup> Simulations were conducted using the Vienna *Ab Initio* Simulation Package (VASP) to find equilibrium crystal structures (refer to **Figure S20** and **Table S2**). The  $\text{Ni(OH)}_2$  unit cell model comprises five atoms: one Ni atom, two O atoms, and two H atoms, with a space group of  $P3m1$ . The calculations were set with a plane wave cut-off energy of 450 eV and  $k$ -points configured as a  $7 \times 7 \times 6$  Gamma-centered grid. The valence electron configurations were Ni  $3d^8 4s^2$ , O  $2s^2 2p^4$ , and H  $1s^1$ . The COF unit cell model consists of 81 atoms: nine N atoms, 45 C atoms, and 27 H atoms, with a space group of  $P6/m$ . Similarly, the calculations were set with a plane wave cut-off energy of 450 eV and  $k$ -points configured as a  $1 \times 1 \times 7$  Gamma-centered grid. The valence electron configurations were N  $2s^2 2p^3$ , C  $2s^2 2p^2$ , and H  $1s^1$ . For the self-consistent electronic calculations for electronic properties (**Figure S21**), the  $\text{Ni(OH)}_2$  model used  $k$ -points of  $7 \times 7 \times 6$  and a cut-off energy of 450 eV, with total energy convergence set to  $1 \times 10^{-5}$  eV/atom. The path in the first Brillouin zone for the wave number was set sequentially as G (0, 0, 0)  $\rightarrow$  A (0, 0, 0.5)  $\rightarrow$  H (0.333, 0.333, 0.5)  $\rightarrow$  K (0.333, 0.333, 0)  $\rightarrow$  G (0, 0, 0)  $\rightarrow$  M (0.5, 0, 0)  $\rightarrow$  L (0.5, 0, 0.5)  $\rightarrow$  H (0.333, 0.333, 0.5). For COF, the  $k$ -points were set as  $1 \times 1 \times 7$ , with a cut-off energy of 450 eV and total energy convergence set to  $1 \times 10^{-5}$  eV/atom. The path in the first Brillouin zone was set as G (0, 0, 0)  $\rightarrow$  K (0.333, 0.333, 0)  $\rightarrow$  M (0.5, 0, 0)  $\rightarrow$  H (0.333, 0.333, 0.5)  $\rightarrow$  A (0, 0, 0.5)  $\rightarrow$  L (0.5, 0, 0.5)  $\rightarrow$  M (0.5, 0, 0)  $\rightarrow$  G (0, 0, 0). These settings and calculations ensure the precision of the geometry optimization and electronic band structure calculations for the  $\text{Ni(OH)}_2$  and COF models, providing a reliable theoretical foundation for further understanding the electron transfer behavior between them.

## 2. Supplementary figures

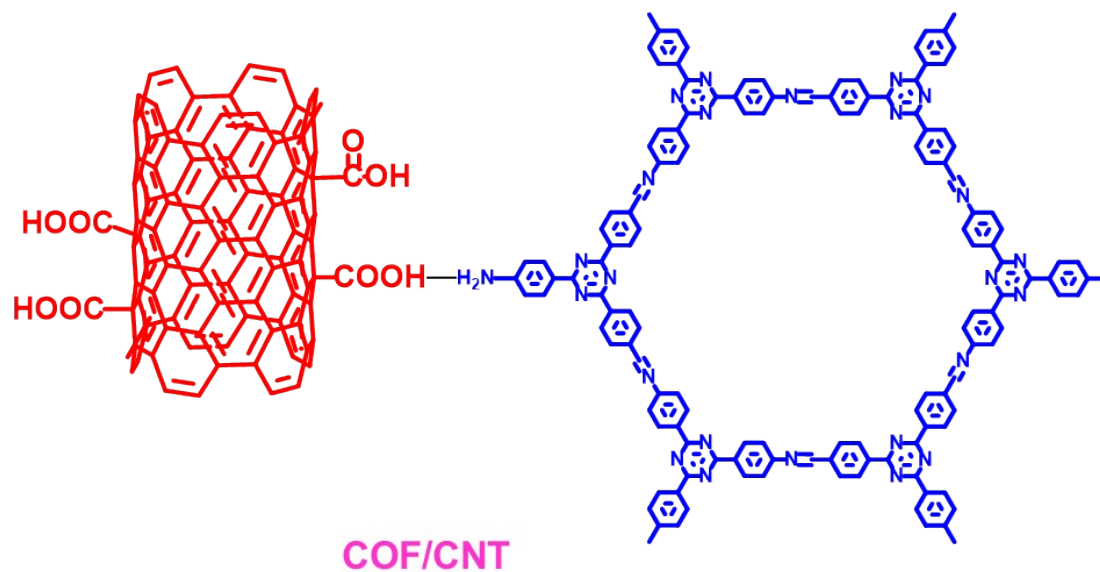

**Figure S1.** Illustration of the triazine-based COF and CNT nanocomposites (COF/CNT).

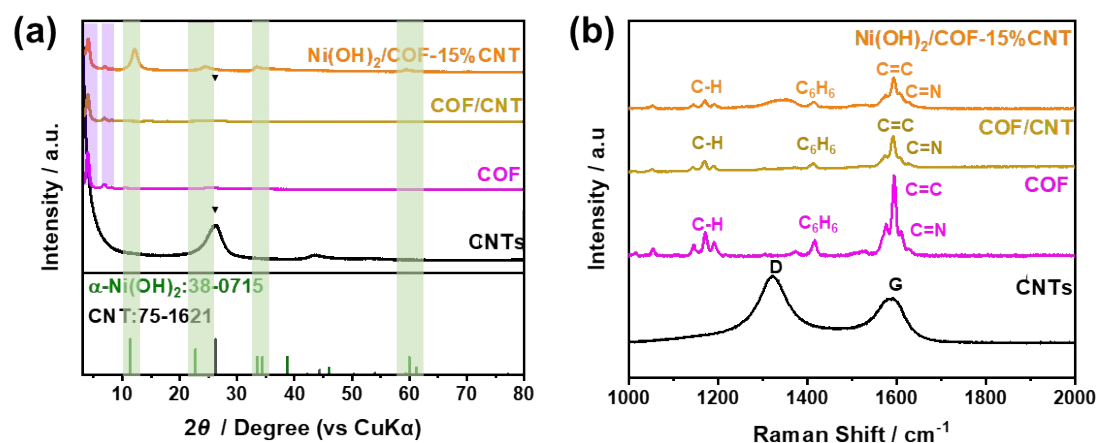

**Figure S2.** (a) XRD patterns and (b) Raman spectra of CNTs, COF, COF/CNT, and Ni(OH)<sub>2</sub>/COF-15%CNT.

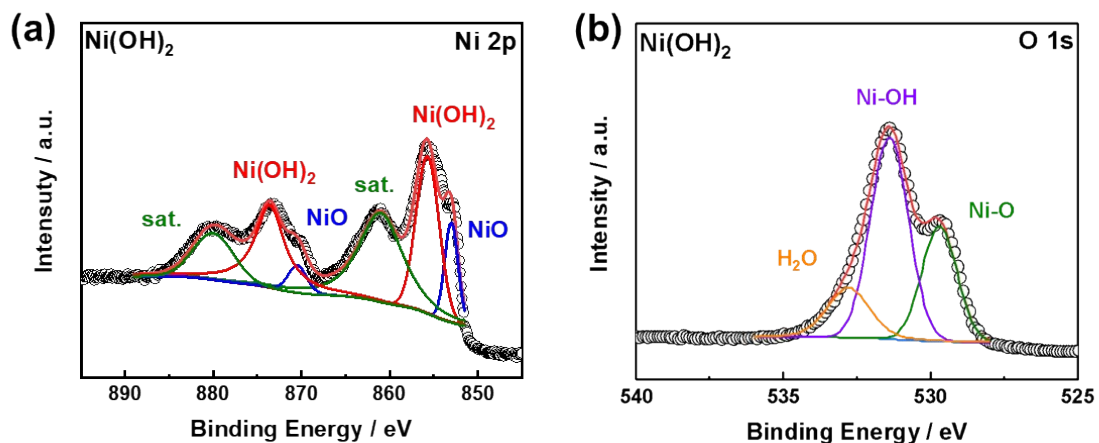

**Figure S3.** High-resolution XPS (a) Ni 2p and (b) O 1s spectra of Ni(OH)<sub>2</sub>.

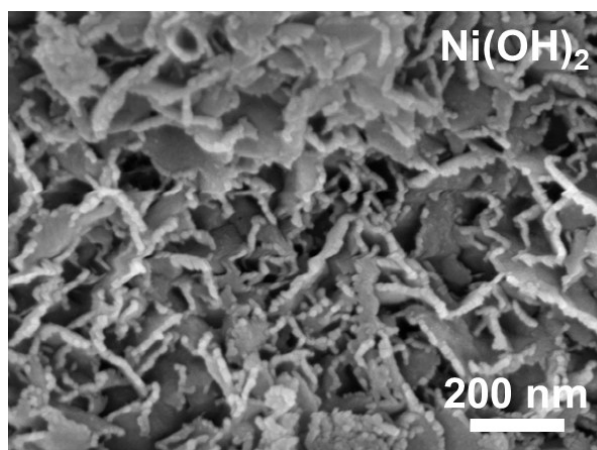

**Figure S4.** SEM image of Ni(OH)<sub>2</sub>.

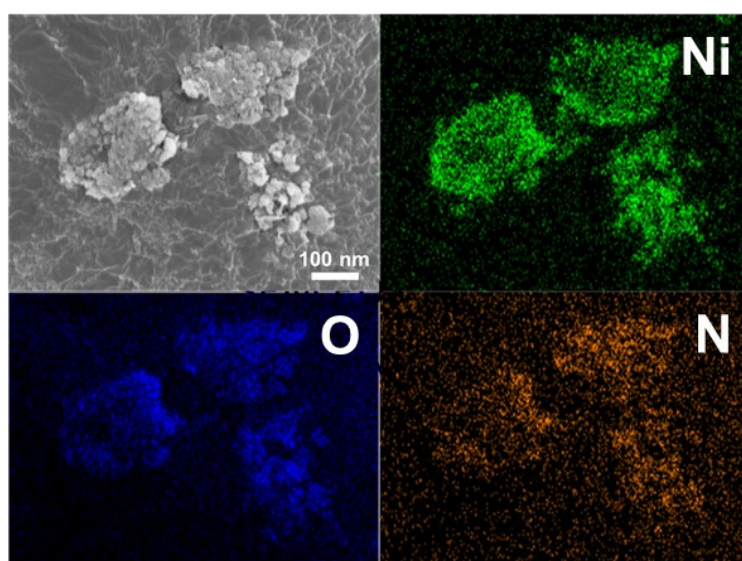

**Figure S5.** EDS elemental mapping images of Ni(OH)<sub>2</sub>/COF/CNT.

Thermogravimetric analysis (TGA) was carried out to estimate the Ni(OH)<sub>2</sub> contents in the prepared samples. **Figure S6** shows the temperature dependent weight loss profiles for the samples. Both CNT and COF samples can be entirely decomposed by heating to a high temperature at ca. 700 °C under an air environment (**Figure S6a-b**). For Ni(OH)<sub>2</sub>, the weight loss below 100 °C can be assigned to the physisorbed water originating from ambient environment, while the weight loss in the region between 100 and 300 °C is attributed to the removal of crystal water (**Figure S6c**). The significant weight loss from 300 to ca. 500 °C corresponds to dehydration of Ni(OH)<sub>2</sub> (i.e., converting Ni(OH)<sub>2</sub> into NiO).<sup>8</sup> In this regard, the stoichiometric formula of the pure Ni(OH)<sub>2</sub> sample is characterized as Ni(OH)<sub>2</sub>·0.25H<sub>2</sub>O. Since the growth of Ni(OH)<sub>2</sub> followed the same procedures, it is assumed that the existing Ni(OH)<sub>2</sub> component in the Ni(OH)<sub>2</sub>-based composite samples shares the same stoichiometric formula. The Ni(OH)<sub>2</sub>-based composite samples show additional weight loss of carbon-based material (COF and/or CNT) in the profiles (**Figure S6d-f**). By excluding the contribution(s) from COF and/or CNT, the Ni(OH)<sub>2</sub> contents can also be obtained. Accordingly, the Ni(OH)<sub>2</sub> contents are estimated as 32.8, 57.6, and 42.2% in Ni(OH)<sub>2</sub>/CNT, Ni(OH)<sub>2</sub>/COF, and Ni(OH)<sub>2</sub>/COF/CNT, respectively.

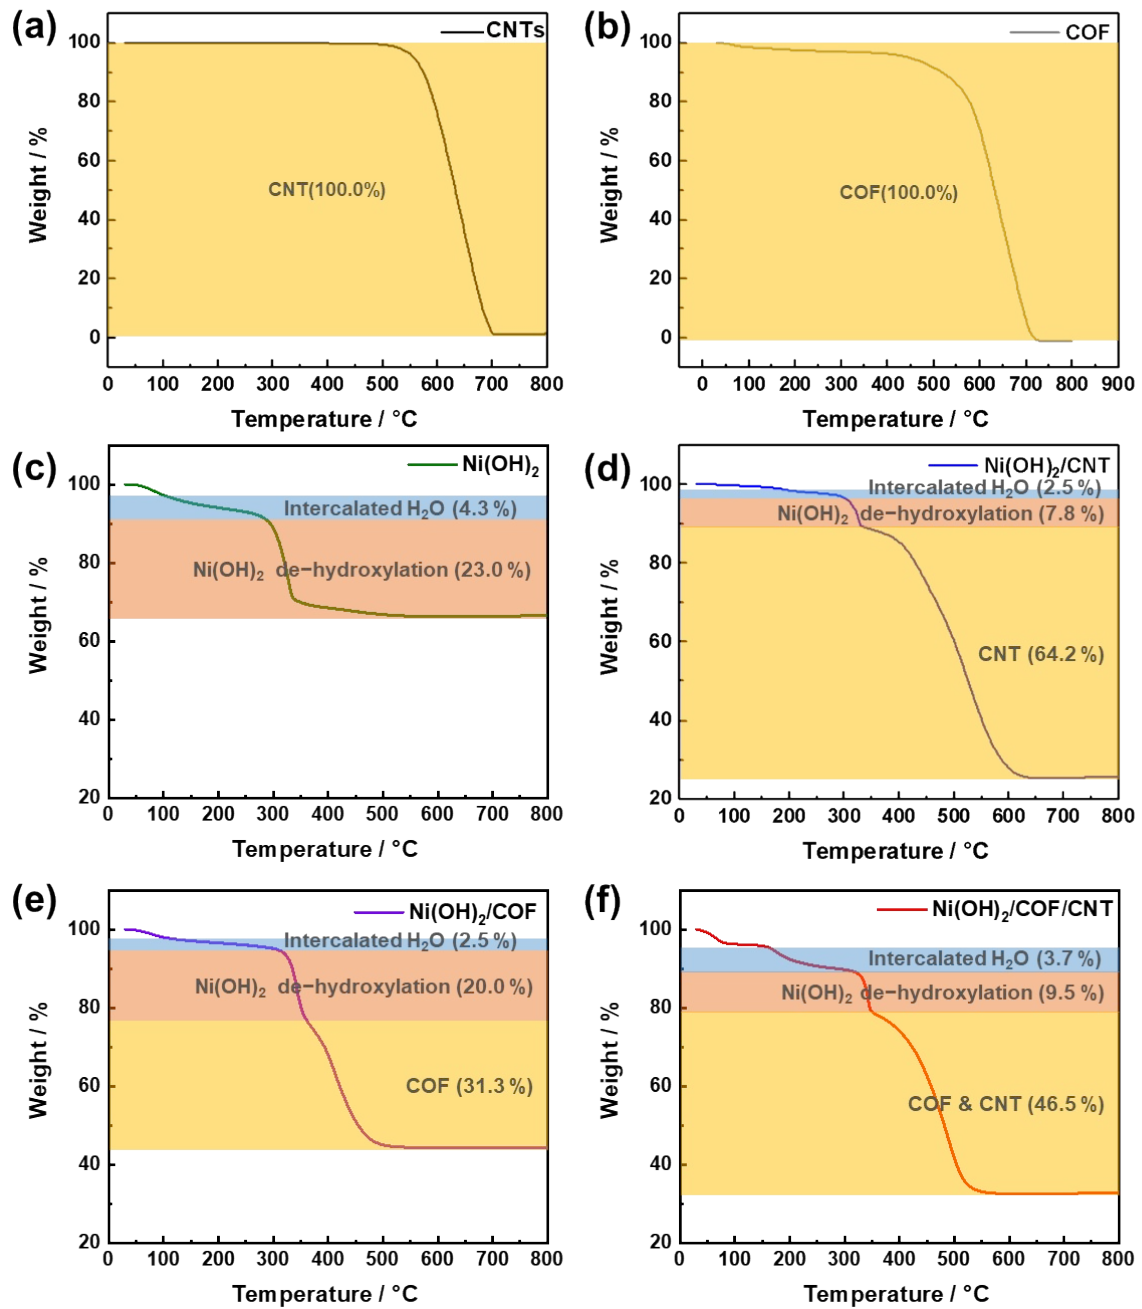

**Figure S6.** TGA weight loss curves of (a) CNTs, (b) COF, (c) Ni(OH)<sub>2</sub>, (d) Ni(OH)<sub>2</sub>/CNT, (e) Ni(OH)<sub>2</sub>/COF, and (f) Ni(OH)<sub>2</sub>/COF/CNT.



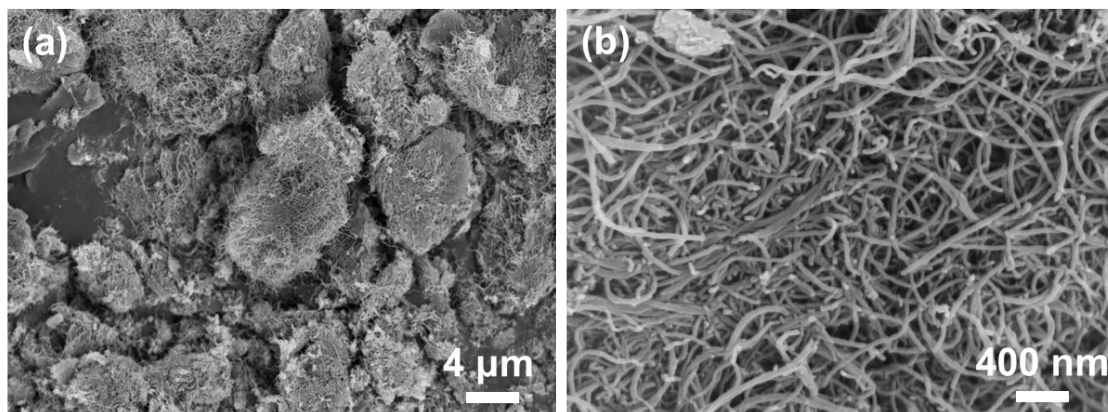

**Figure S7.** SEM images of Ni(OH)<sub>2</sub>/CNT.

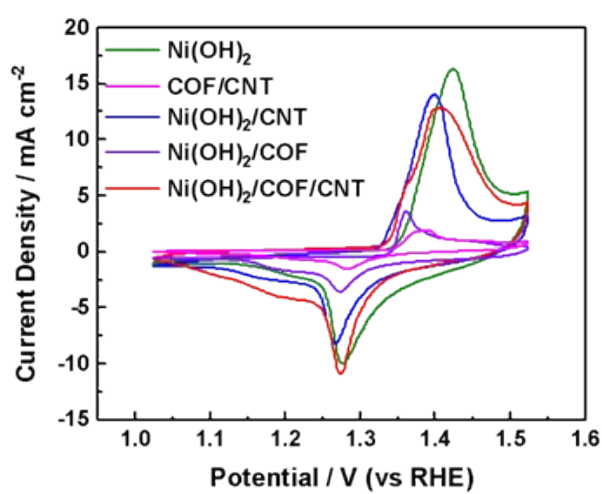

**Figure S8.** CV curves of Ni(OH)<sub>2</sub>, COF/CNT, Ni(OH)<sub>2</sub>/CNT, Ni(OH)<sub>2</sub>/COF, and Ni(OH)<sub>2</sub>/COF/CNT in 1 M KOH.

To investigate the effect of the CNT content on electrochemical behavior, two organic-inorganic samples were prepared using different CNT content in the COF/CNT nanocomposites. Ni(OH)<sub>2</sub>/COF/CNT and Ni(OH)<sub>2</sub>/COF-15%CNT were prepared from 30 and 15 wt.% CNT in the COF/CNT nanocomposites, respectively. The Ni(OH)<sub>2</sub>/COF-15%CNT hybrid material is also confirmed to be successfully prepared based on the characterization data (**Figure S2**). By adding more CNT in the composite samples, progressively higher current responses can be observed in the CV (KOH) and LSV (KOH with urea) tests. For the CV tests (**Figure S8** and **Figure S9a**), the anodic peak current density shows the ascending order: Ni(OH)<sub>2</sub>/COF (3.6 mA cm<sup>-2</sup>) < Ni(OH)<sub>2</sub>/COF/CNT-15%CNT (4.9 mA cm<sup>-2</sup>) < Ni(OH)<sub>2</sub>/COF/CNT (12.8 mA cm<sup>-2</sup>). For the LSV tests (**Figure 3a** and **Figure S9b**), the current density at 1.5 V also increases in the following order: (15 mA cm<sup>-2</sup>) < Ni(OH)<sub>2</sub>/COF/CNT-15%CNT (38 mA cm<sup>-2</sup>) < Ni(OH)<sub>2</sub>/COF/CNT (153 mA cm<sup>-2</sup>). Similarly, by estimating the Ni(OH)<sub>2</sub> content in Ni(OH)<sub>2</sub>/COF-15%CNT (**Figure S9c**, followed the same procedures as mentioned previously, please refer to page S6), the mass activity of Ni(OH)<sub>2</sub> also shows the same trend (**Figure 3c** and **Figure S9d**): Ni(OH)<sub>2</sub>/COF (26 A g<sub>Ni(OH)<sub>2</sub></sub><sup>-1</sup>) < Ni(OH)<sub>2</sub>/COF/CNT-15%CNT (65 A g<sub>Ni(OH)<sub>2</sub></sub><sup>-1</sup>) < Ni(OH)<sub>2</sub>/COF/CNT (363 A g<sub>Ni(OH)<sub>2</sub></sub><sup>-1</sup>). Thus, the above results address that adding sufficient amount of CNT in the composite samples can guarantee satisfactory electron transport in the composite sample for improved electrochemical behavior.

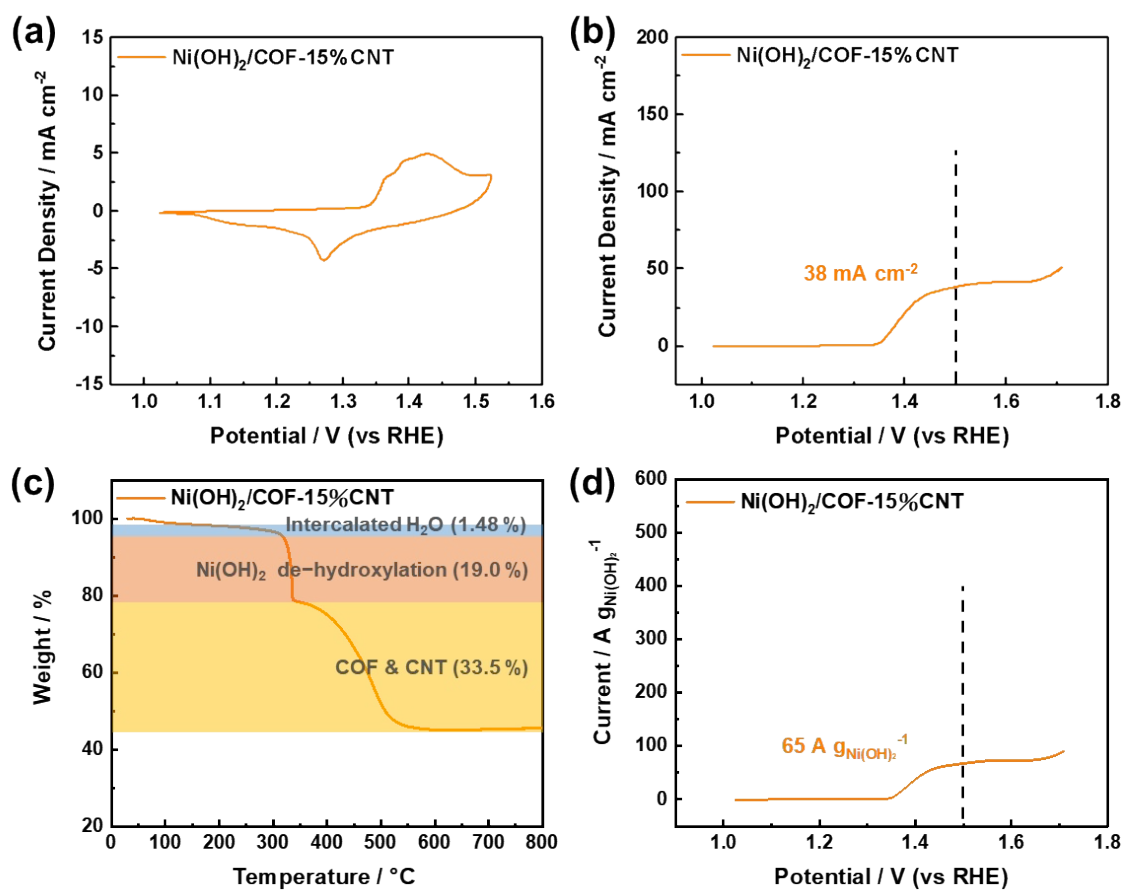

**Figure S9.** The electrochemical evaluations of Ni(OH)<sub>2</sub>/COF-15%CNT. (a) CV curve measured in 1 M KOH, (b) *iR*-corrected LSV curve measured in 1 M KOH with 0.33 M urea, (c) TGA weight loss curve, and (d) *iR*-corrected LSV curves with the current responses normalized to the mass of Ni(OH)<sub>2</sub>.

The turnover frequency (TOF) values were estimated by the following equation:<sup>9</sup>

$$TOF = IN_A/nF\Gamma \quad (S1)$$

where  $I$ ,  $N_A$ ,  $n$ ,  $F$ ,  $\Gamma$  represent the current density ( $A\text{ cm}^{-2}$ ), the Avogadro number ( $6.02 \times 10^{23}\text{ mol}^{-1}$ ), the number of involved electrons ( $n = 6$ ), the Faraday constant ( $96485\text{ C mol}^{-1}$ ), the number of active sites ( $\text{cm}^{-2}$ ), respectively. The only unknown parameter in this equation is the number of active sites, which can be calculated from the integrated area in the negative sweep of the CV curve in 1 M KOH electrolyte (**Figure S8**). Given the  $\Gamma$  value, the TOF value can be then determined by taking the current density at a certain potential from the LSV curve measured in 1 M KOH with 0.33 M urea (**Figure 3a**). Notably, the reported TOF values for the samples range from 1.4 to 1.6 V in this work (**Figure 3d**). The reason is that UOR and OER are competitive reactions at high anodic potentials. The onset potential toward UOR is 1.37 V for both  $\text{Ni(OH)}_2$  and  $\text{Ni(OH)}_2/\text{COF}/\text{CNT}$ , while the onset potentials toward OER are 1.57 and 1.61 V for  $\text{Ni(OH)}_2$  and  $\text{Ni(OH)}_2/\text{COF}/\text{CNT}$ , respectively. Thus, the potential window ranging from 1.4 to 1.6 V can better reflect the TOF value corresponding to urea oxidation for the  $\text{Ni(OH)}_2/\text{COF}/\text{CNT}$  electrocatalyst.

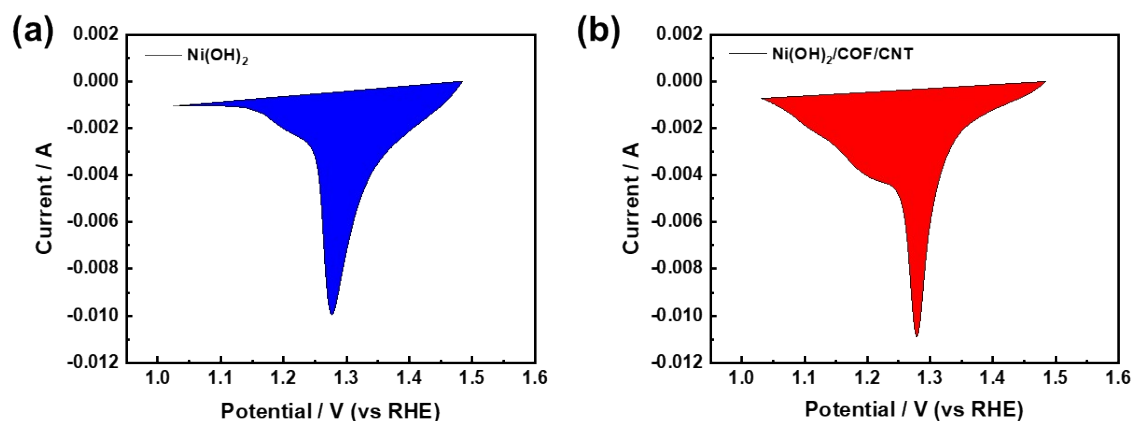

**Figure S10.** Evaluations of active sites of (a)  $\text{Ni(OH)}_2$  and (b)  $\text{Ni(OH)}_2/\text{COF}/\text{CNT}$  in 1 M KOH. Data taken from **Figure S8**.

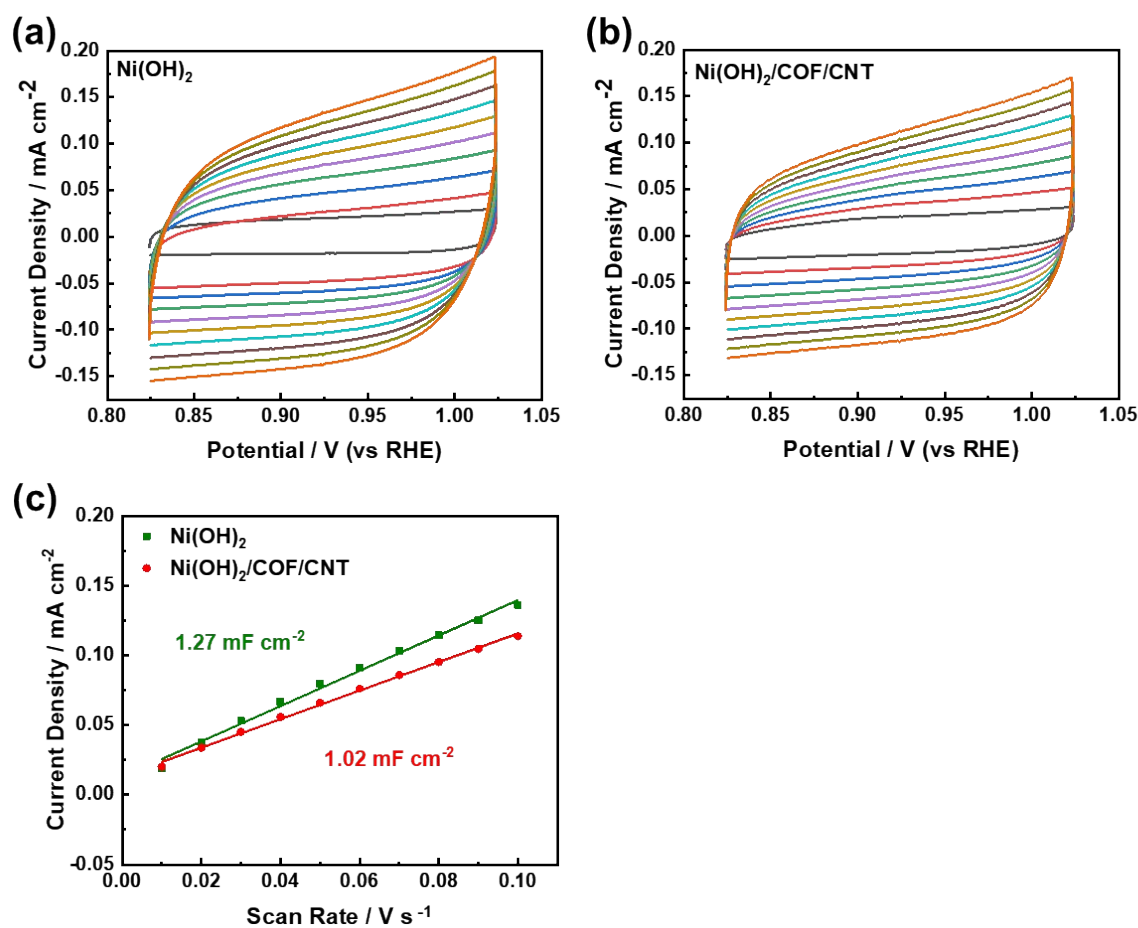

**Figure S11.** CV curves of (a)  $\text{Ni(OH)}_2$  and (b)  $\text{Ni(OH)}_2/\text{COF}/\text{CNT}$  in 1 M KOH with 0.33 M urea. (c) double-layer capacitance evaluations of  $\text{Ni(OH)}_2$  and  $\text{Ni(OH)}_2/\text{COF}/\text{CNT}$ .

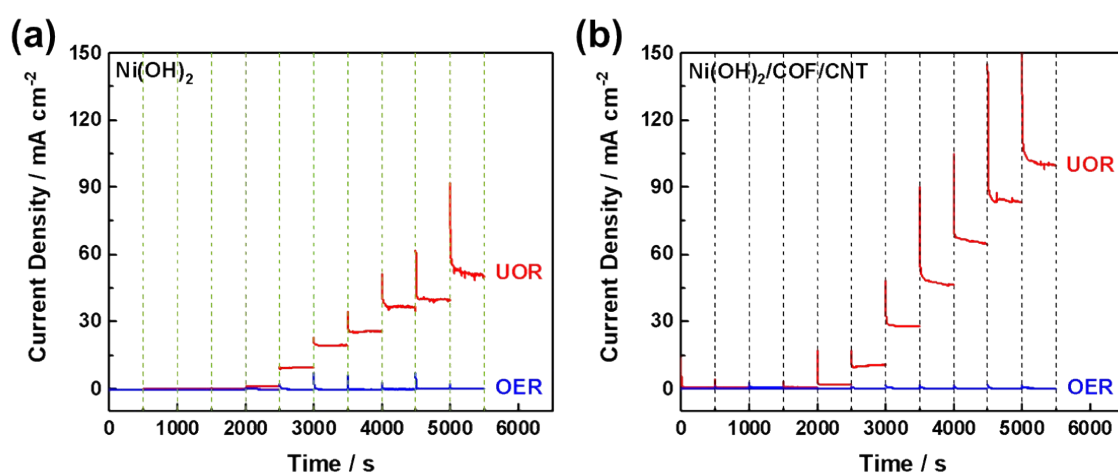

**Figure S12.** CA curves of (a)  $\text{Ni(OH)}_2$  and (b)  $\text{Ni(OH)}_2/\text{COF}/\text{CNT}$  measured between 1.27 and 1.47 V (interval of 20 mV, lasting 500 s for each step) for UOR/OER comparisons.

The reaction rate constant toward UOR ( $k$ ) can be calculated based on the equation:<sup>10</sup>

$$I_{\text{CAT}} / I_{\text{L}} = (\pi k C)^{0.5} t^{0.5} \quad (\text{S2})$$

where  $I_{\text{CAT}}$  and  $I_{\text{L}}$  are the limiting current densities ( $\text{mA cm}^{-2}$ ) measured in the electrolyte with and without urea, respectively;  $C$  is the electrolyte concentration of urea ( $3.3 \times 10^{-4} \text{ mol cm}^{-3}$ ); and  $t$  is the polarization time (s).

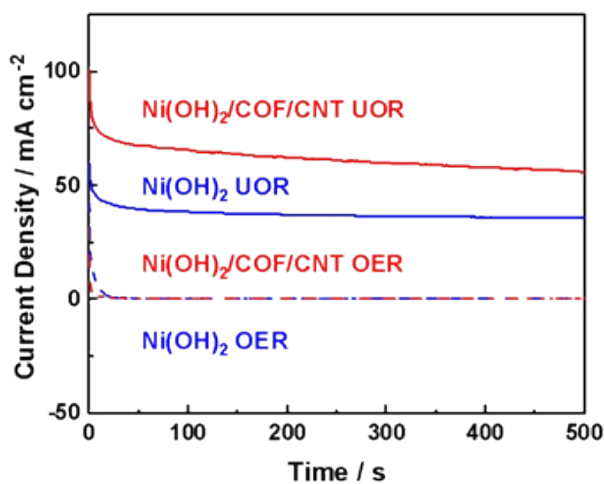

**Figure S13.** CA curves of Ni(OH)<sub>2</sub> and Ni(OH)<sub>2</sub>/COF/CNT in 1 M KOH with/without 0.33 M urea.

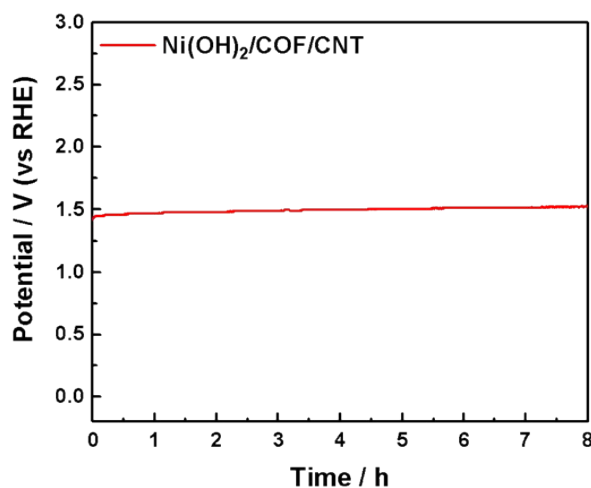

**Figure S14.** Stability test of Ni(OH)<sub>2</sub>/COF/CNT at 50 mA cm<sup>-2</sup> for 8 h in 1 M KOH with/without 0.33 M urea.

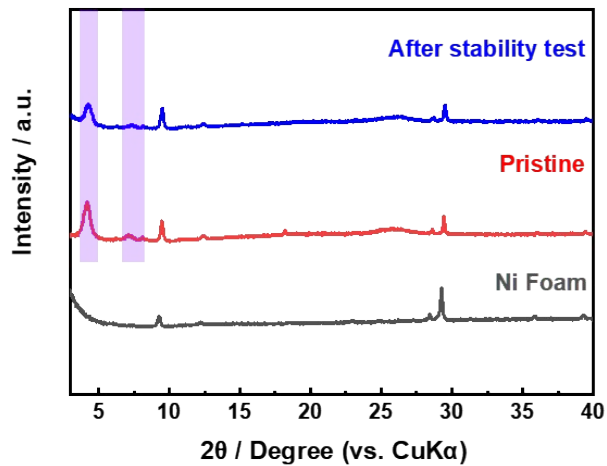

**Figure S15.** XRD patterns of the Ni foam substrate, pristine Ni(OH)<sub>2</sub>/COF/CNT, and Ni(OH)<sub>2</sub>/COF/CNT after the stability test.

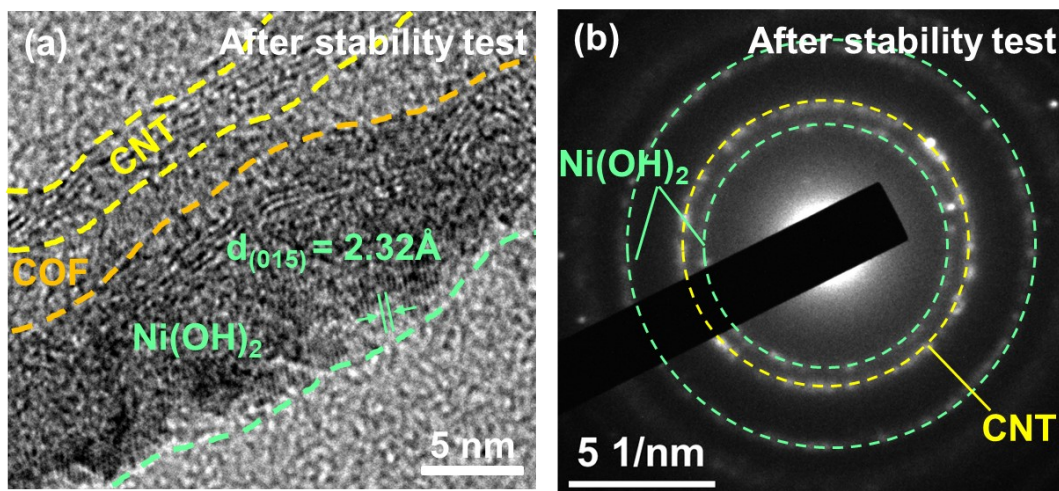

**Figure S16.** (a) High-resolution TEM images and (b) SAED pattern of Ni(OH)<sub>2</sub>/COF/CNT after the stability test.

Notably, the strong K signals in **Figure S17c** are from the residual KOH electrolyte salt after the stability test.

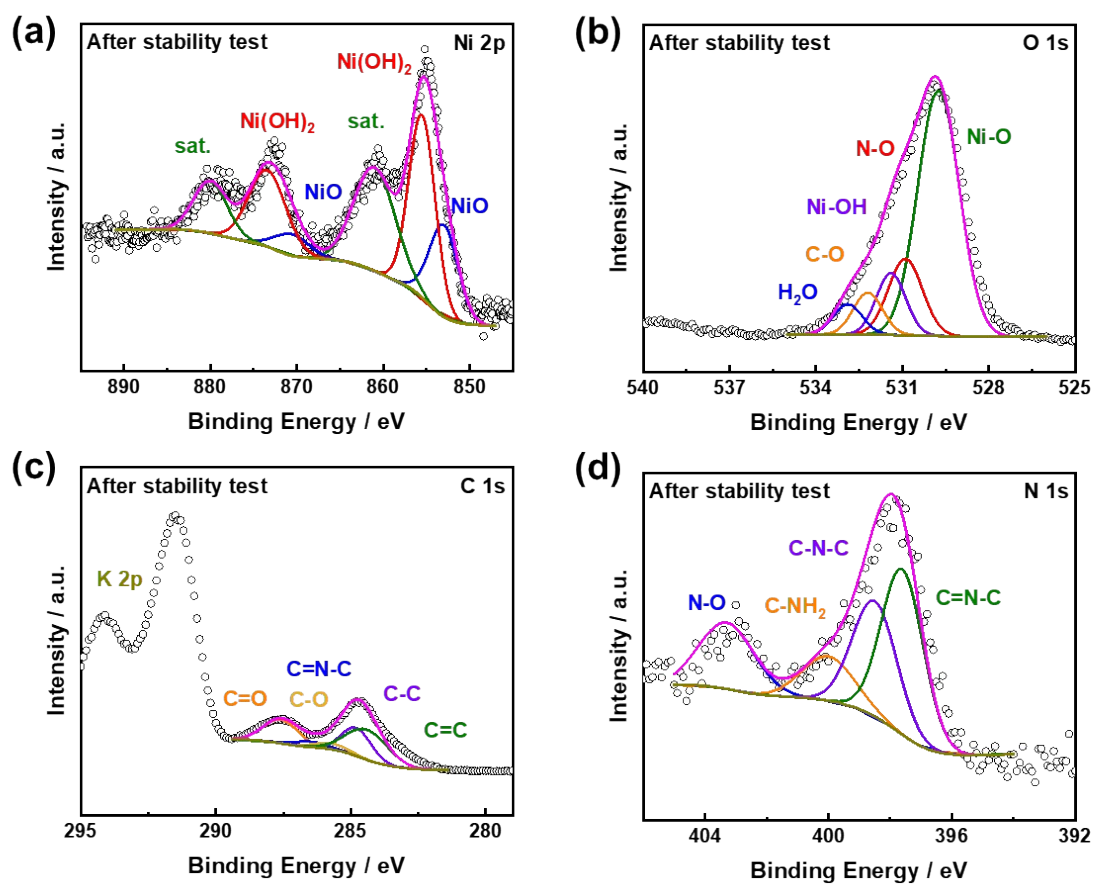

**Figure S17.** High-resolution XPS (a) Ni 2p, (b) O 1s, (c) C 1s, and (d) N 1s spectra of Ni(OH)<sub>2</sub>/COF/CNT after the stability test.



**Figure S18** shows the UPS spectra of Ni(OH)<sub>2</sub> and COF. The secondary electron cut-off ( $E_{\text{cutoff}}$ ) and the onset value of the valence band ( $E_{\text{onset}}$ ) can be determined by the higher and lower binding energy regions, respectively. The ionization potential (IP) represents the energy difference between vacuum energy level ( $E_{\text{vac}}$ ) and valence band maximum ( $E_{\text{v}}$ ). Given the photon energy of the UV source (21.2 eV for He lamp), the IP values can be calculated based on the equation:<sup>11</sup>

$$\text{IP} = 21.2 - E_{\text{cutoff}} + E_{\text{onset}} \quad (\text{S3})$$

Accordingly, the IP values are 4.80 and 5.45 eV for Ni(OH)<sub>2</sub> and COF, respectively.

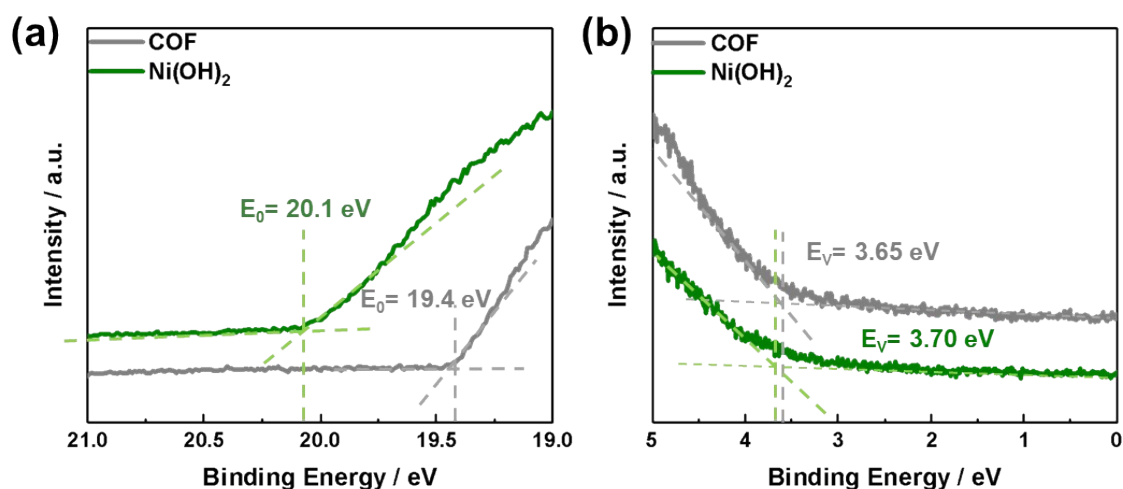

**Figure S18.** UPS spectra of Ni(OH)<sub>2</sub> and COF at (a) higher and (b) binding energy regions.

The characteristic signals of the d-d transition of Ni can be observed in the UV spectrum of Ni(OH)<sub>2</sub> (**Figure S19a**). The results align with the previously reported data.<sup>12, 13</sup> For triazine-based COF, the  $\pi \rightarrow \pi^*$  transition of the conjugated ring systems can be noticed in the UV spectrum of COF (**Figure S19b**). The spectral features agree with the findings in the literature.<sup>14</sup> Followed the reported protocols,<sup>15, 16</sup> the  $E_g$  values of Ni(OH)<sub>2</sub> and COF can be determined by converting the UV-vis spectra into Tauc's plots. Accordingly, the  $E_g$  values are 3.95 and 1.70 eV for Ni(OH)<sub>2</sub> and COF, respectively (**Figure S19c,d**).

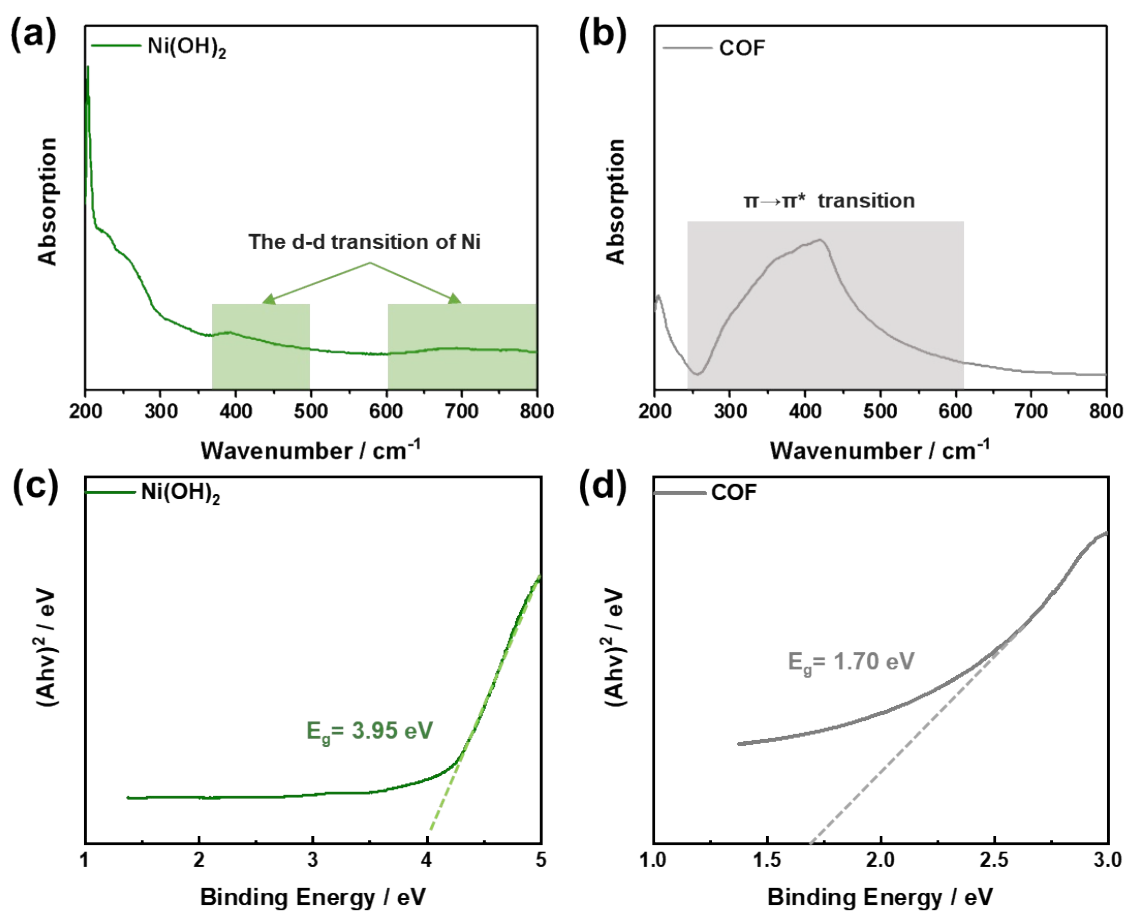

**Figure S19.** (a,b) UV spectra and (c,d) the corresponding Tauc's plots of (a,c) Ni(OH)<sub>2</sub> and (b,d) COF.

To gain deeper insights into the electron transfer behavior between Ni(OH)<sub>2</sub> and COF, we constructed models of both materials and performed detailed atomic structure optimizations (**Figure S20** and **Table S2**). Based on the simulation results, the electronic properties of the Ni(OH)<sub>2</sub> and COF models can be obtained (**Figure S21**). The calculations revealed that the Fermi levels of Ni(OH)<sub>2</sub> and COF are 2.5 eV and -0.7 eV, respectively. Upon contact, electrons transfer from the higher Fermi level of Ni(OH)<sub>2</sub> to the lower Fermi level of COF until equilibrium is reached. This rearrangement results in lowering the Fermi level of Ni(OH)<sub>2</sub> and raising the Fermi level of COF, ultimately achieving a common equilibrium Fermi level. The migration of electrons from Ni(OH)<sub>2</sub> to COF creates a positively charged region in Ni(OH)<sub>2</sub> and a negatively charged region in COF. This charge distribution establishes an internal electric field allowing rapid electron transfer within the catalyst, which is a characteristic of the *p-n* heterojunction effect.

Notably, in the calculations for three-dimensional Ni(OH)<sub>2</sub> crystals, we use the GGA to handle exchange-correlation energy. This approximation method tends to underestimate the conduction band levels, resulting in a calculated band gap that is lower than the actual value of Ni(OH)<sub>2</sub>. We also employ the GGA exchange-correlation energy approximation for two-dimensional COF materials to calculate the band gap using the same method. However, due to the quantum confinement effect, the atomic layer thickness of two-dimensional COF materials is skinny, and the movement of electrons and holes is confined to the two-dimensional plane. This confinement leads to an increase in the band gap of two-dimensional COF materials.

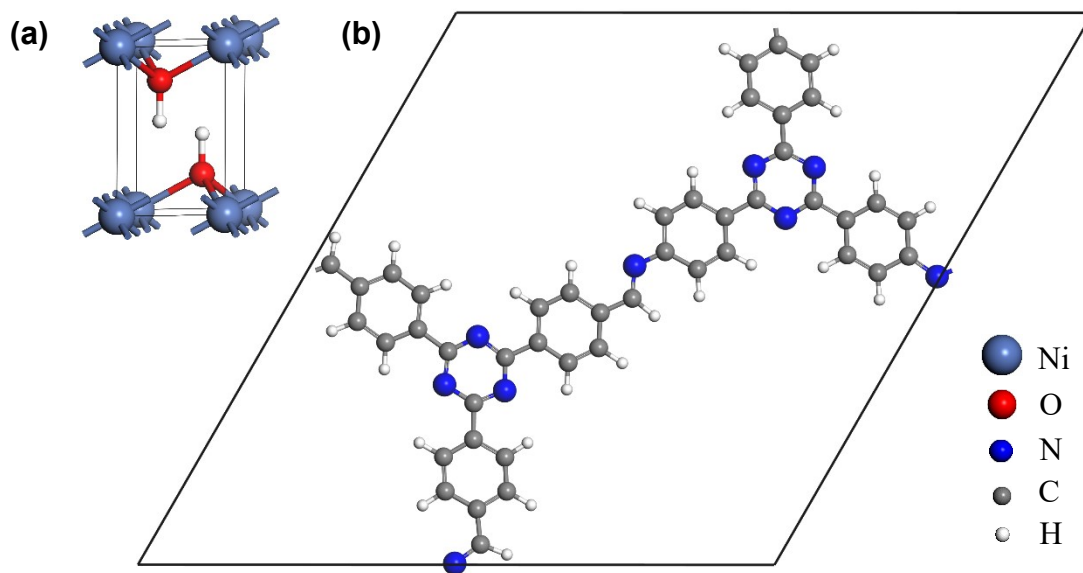

**Figure S20.** Schematic of the Ni(OH)<sub>2</sub> crystal structure (a) and COF crystalline porous material (b). The atoms are represented by spheres: Ni (purple, large), O (red, intermediate between large and medium), N (blue, medium), C (gray, intermediate between medium and small), and H (white, small).

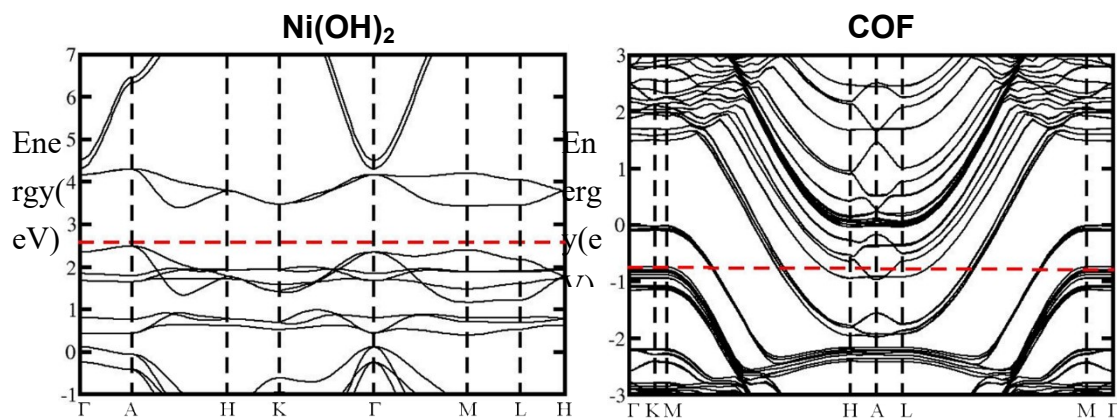

**Figure S21.** The left and right panels illustrate the electronic band structures of the Ni(OH)<sub>2</sub> model, with a band gap of 0.907 eV, and the COF model, with a band gap of 1.487 eV. The red dashed lines represent the Fermi levels, while the black dashed lines indicate the reciprocal space paths in the first Brillouin zone.

### 3. Supplementary Table

**Table S1** Comparison of UOR performances of various electrocatalysts reported in the literature.

| Catalysts                                                       | Electrolyte              | Current density<br>and/or mass activity<br>at 1.5 (V vs. RHE)                                           | Stability test                 |
|-----------------------------------------------------------------|--------------------------|---------------------------------------------------------------------------------------------------------|--------------------------------|
| Ni(OH) <sub>2</sub> /COF/CNT<br>this work                       | 1 M KOH +<br>0.33 M urea | 153 mA cm <sup>-2</sup><br>153 A g <sup>-1</sup><br>363 A g <sub>Ni(OH)<sub>2</sub></sub> <sup>-1</sup> | 24 h @ 20 mA cm <sup>-2</sup>  |
| <b>Ni(OH)<sub>2</sub>-based electrocatalysts</b>                |                          |                                                                                                         |                                |
| Co-doped α-Ni(OH) <sub>2</sub> <sup>17</sup>                    | 1 M KOH +<br>0.33 M urea | ~45 mA cm <sup>-2</sup><br>~707 A g <sup>-1</sup>                                                       | 24 h @ 1.41 V                  |
| Co-Ni(OH) <sub>2</sub> <sup>18</sup>                            | 1 M KOH +<br>0.33 M urea | >350 mA cm <sup>-2</sup><br>>18 A g <sup>-1</sup>                                                       | 100 h @ 10 mA cm <sup>-2</sup> |
| Mn-doped NiCo LDH/CNT <sup>19</sup>                             | 1 M KOH +<br>0.50 M urea | ~175 mA cm <sup>-2</sup><br>~35 A g <sup>-1</sup>                                                       | 24 h @ 1.35 V                  |
| <b>Heterostructured electrocatalysts</b>                        |                          |                                                                                                         |                                |
| NiS <sub>2</sub> /SnS <sub>2</sub> <sup>20</sup>                | 1 M KOH +<br>0.33 M urea | ~75 mA cm <sup>-2</sup><br>~180 A g <sup>-1</sup>                                                       | 12 h @ 1.37 V                  |
| Ni <sub>3</sub> S <sub>2</sub> -Ni <sub>3</sub> P <sup>21</sup> | 1 M KOH +<br>0.5 M urea  | >150 mA cm <sup>-2</sup>                                                                                | 20 h @ 1.5 V                   |
| NiF <sub>3</sub> /Ni <sub>2</sub> P <sup>22</sup>               | 1 M KOH +                | ~70 mA cm <sup>-2</sup>                                                                                 | 10h @ 10 mA cm <sup>-2</sup>   |

|                                                                |                          |                                                        |                                                       |
|----------------------------------------------------------------|--------------------------|--------------------------------------------------------|-------------------------------------------------------|
|                                                                | 0.33 M urea              | $\sim 11 \text{ A g}^{-1}$                             |                                                       |
| <b>Heterojunction electrocatalysts</b>                         |                          |                                                        |                                                       |
| CoS <sub>2</sub> -MoS <sub>2</sub> <sup>23</sup>               | 1 M KOH +<br>0.50 M urea | $> 350 \text{ mA cm}^{-2}$                             | 30 h @ 10 mA cm <sup>-2</sup>                         |
| CoMn/CoMn <sub>2</sub> O <sub>4</sub> <sup>24</sup>            | 1 M KOH +<br>0.50 M urea | $> 300 \text{ mA cm}^{-2}$<br>$> 250 \text{ A g}^{-1}$ | 16.7 h @ 20 mA cm <sup>-2</sup>                       |
| NiSe <sub>2</sub> /FeSe <sub>2</sub> <sup>25</sup>             | 1 M KOH +<br>0.33 M urea | $> 140 \text{ mA cm}^{-2}$<br>$> 467 \text{ A g}^{-1}$ | 15 h @ 10 mA cm <sup>-2</sup>                         |
| MoS <sub>2</sub> /Ni <sub>3</sub> S <sub>2</sub> <sup>26</sup> | 1 M KOH +<br>0.50 M urea | $> 200 \text{ mA cm}^{-2}$                             | 24 h @ 10 mA cm <sup>-2</sup>                         |
| NiS/MoS <sub>2</sub> <sup>27</sup>                             | 1 M KOH +<br>0.50 M urea | $> 300 \text{ mA cm}^{-2}$                             | 25 h @ 1.5 V                                          |
| CoS <sub>x</sub> -MoO <sub>x</sub> @NF <sup>28</sup>           | 1 M KOH +<br>0.33 M urea | $\sim 43 \text{ mA cm}^{-2}$                           | 1000 CV cycles<br>between $\sim 1.1$ and $\sim 1.5$ V |
| Se/NiSe <sub>2</sub> <sup>29</sup>                             | 1 M KOH +<br>0.33 M urea | $> 400 \text{ mA cm}^{-2}$<br>$> 267 \text{ A g}^{-1}$ | 20 h @ 1.45 V<br>with sea water                       |

**Table S2** Calculated equilibrium lattice constants of the Ni(OH)<sub>2</sub> crystal structure and COF crystalline porous material. Ni(OH)<sub>2</sub> results are much closer to the other theoretical values.<sup>30, 31</sup>

|                     | Lattice constant (Å)       |                            |                          | Angle (°) |         |          |
|---------------------|----------------------------|----------------------------|--------------------------|-----------|---------|----------|
|                     | <i>a</i>                   | <i>b</i>                   | <i>c</i>                 | $\alpha$  | $\beta$ | $\gamma$ |
| Ni(OH) <sub>2</sub> | 3.20, 3.12 <sup>30</sup>   | 3.20, 3.12 <sup>30</sup>   | 4.40, 4.66 <sup>30</sup> | 90.00     | 90.00   | 120.00   |
| COF                 | 25.24, 25.71 <sup>31</sup> | 26.05, 25.71 <sup>31</sup> | 2.72                     | 90.00     | 90.00   | 120.00   |

#### 4. References

1. A. F. M. El-Mahdy, C. H. Kuo, A. Alshehri, C. Young, Y. Yamauchi, J. Kim and S. W. Kuo, *J. Mater. Chem. A*, 2018, **6**, 19532.
2. J. P. Jyothibas, D. W. Kuo and R. H. Lee, *Cellulose*, 2019, **26**, 4495.
3. H. C. Yang, Y. Y. Chen, S. Y. Suen and R. H. Lee, *Polymer*, 2023, **273**, 125853.
4. J. P. Perdew and W. Yue, *Phys Rev B Condens Matter*, 1986, **33**, 8800.
5. G. Kresse and J. Furthmüller, *Comput. Mater. Sci.*, 1996, **6**, 15.
6. G. Kresse and J. Hafner, *J. Phys.: Condens. Matter*, 1994, **6**, 8245.
7. G. Kresse and J. Furthmüller, *Phys. Rev. B*, 1996, **54**, 11169.
8. M. Aghazadeh, M. Ghaemi, B. Sabour and S. Dalvand, *J. Solid State Electrochem.*, 2014, **18**, 1569.
9. S. Anantharaj, P. E. Karthik and S. Noda, *Angew. Chem. Int. Ed.*, 2021, **60**, 23051.
10. R. K. Singh and A. Schechter, *Electrochim. Acta*, 2018, **278**, 405.
11. Q. Dong, C. Zhu, M. Chen, C. Jiang, J. Guo, Y. Feng, Z. Dai, S. K. Yadavalli, M. Hu, X. Cao, Y. Li, Y. Huang, Z. Liu, Y. Shi, L. Wang, N. P. Padture and Y. Zhou, *Nat. Commun.*, 2021, **12**, 973.
12. J. Ran, J. Yu and M. Jaroniec, *Green Chem.*, 2011, **13**.
13. J. Yu, S. Wang, B. Cheng, Z. Lin and F. Huang, *Catal. Sci. Technol.*, 2013, **3**, 1782.
14. J. Bi, W. Fang, L. Li, J. Wang, S. Liang, Y. He, M. Liu and L. Wu, *Macromol. Rapid Commun.*, 2015, **36**, 1799.
15. I. Vamvasakis, I. T. Papadas, T. Tzanoudakis, C. Drivas, S. A. Choulis, S. Kennou and G. S. Armatas, *ACS Catal.*, 2018, **8**, 8726.
16. N. Singh, D. Yadav, S. V. Mulay, J. Y. Kim, N. J. Park and J. O. Baeg, *ACS Appl. Mater. Interfaces*, 2021, **13**, 14122.
17. Y. Liu, Z. Yang, Y. Zou, S. Wang and J. He, *Energy Environ. Mater.*, 2023, **0**,

e12576.

18. Y. Wang, Y. Lu, Y. Shi, J. Wang, Y. Zheng, J. Pan, C. Li and J. Cao, *Appl. Surf. Sci.*, 2023, **640**, 158391.
19. K. Wu, C. Cao, K. Li, C. Lyu, J. Cheng, H. Li, P. Hu, J. Wu, W.-M. Lau, X. Zhu, P. Qian and J. Zheng, *Chem. Eng. J.*, 2023, **452**, 139527.
20. Z. Ji, J. Liu, Y. Deng, S. Zhang, Z. Zhang, P. Du, Y. Zhao and X. Lu, *J. Mater. Chem. A*, 2020, **8**, 14680.
21. J. Liu, Y. Wang, Y. Liao, C. Wu, Y. Yan, H. Xie and Y. Chen, *ACS Appl. Mater. Interfaces*, 2021, **13**, 26948.
22. K. Wang, W. Huang, Q. Cao, Y. Zhao, X. Sun, R. Ding, W. Lin, E. Liu and P. Gao, *Chem. Eng. J.*, 2022, **427**, 130865.
23. C. Li, Y. Liu, Z. Zhuo, H. Ju, D. Li, Y. Guo, X. Wu, H. Li and T. Zhai, *Adv. Energy Mater.*, 2018, **8**, 1801775.
24. C. Wang, H. Lu, Z. Mao, C. Yan, G. Shen and X. Wang, *Adv. Funct. Mater.*, 2020, **30**, 2000556.
25. S. Ni, H. Qu, Z. Xu, X. Zhu, H. Xing, L. Wang, J. Yu, H. Liu, C. Chen and L. Yang, *Appl. Catal. B-Environ.*, 2021, **299**, 120638.
26. Y. Ren, C. Wang, W. Duan, L. Zhou, X. Pang, D. Wang, Y. Zhen, C. Yang and Z. Gao, *J. Colloid Interface Sci.*, 2022, **628**, 446.
27. C. Gu, G. Zhou, J. Yang, H. Pang, M. Zhang, Q. Zhao, X. Gu, S. Tian, J. Zhang, L. Xu and Y. Tang, *Chem. Eng. J.*, 2022, **443**, 136321.
28. Q. Zhang, C. Cui, Z. Wang, F. Deng, S. Qiu, Y. Zhu and B. Jing, *Sci. Total Environ.*, 2023, **858**, 160170.
29. S. Khatun and P. Roy, *J. Colloid Interface Sci.*, 2023, **630**, 844.
30. A. J. Tkalych, K. Yu and E. A. Carter, *The Journal of Physical Chemistry C*, 2015, **119**, 24315.
31. Y. Wan, L. Wang, H. Xu, X. Wu and J. Yang, *J. Am. Chem. Soc.*, 2020, **142**, 4508.
